P5255

### Culprit vessel related myocardial mechanics and prognostic implications following acute myocardial infarction

S.J. Backhaus<sup>1</sup>, J.T. Kowallick<sup>2</sup>, T. Stiermaier<sup>3</sup>, T. Lange<sup>1</sup>, A. Koschalka<sup>1</sup>, J.L. Navarra<sup>1</sup>, J. Lotz<sup>2</sup>, S. Kutty<sup>4</sup>, B. Bigalke<sup>5</sup>, M. Gutberlet<sup>6</sup>, H.J. Feistritz<sup>7</sup>, G. Hasenfuss<sup>1</sup>, H. Thiele<sup>7</sup>, I. Eitel<sup>3</sup>, A. Schuster<sup>1</sup>

<sup>1</sup>Heart Centre Goettingen, Goettingen, Germany; <sup>2</sup>University Medical Center Göttingen, Institute for Diagnostic and Interventional Radiology, Göttingen, Germany; <sup>3</sup>Medical University, Medical Clinic II (Cardiology/Angiology/Intensive Care Medicine), Lübeck, Germany; <sup>4</sup>Children's Hospital and Medical Center, Omaha, United States of America; <sup>5</sup>Charite - Campus Benjamin Franklin, Department of Cardiology, Berlin, Germany; <sup>6</sup>Heart Center of Leipzig, Institute of Diagnostic and Interventional Radiology, Leipzig, Germany; <sup>7</sup>Heart Center of Leipzig, Leipzig, Germany

**Funding Acknowledgement:** DZHK - German Centre for Cardiovascular Research

**Background:** Prognosis in acute myocardial infarction (AMI) depends on the amount of infarct related artery (IRA) subtended myocardium and associated damage but has not been described in great detail. Consequently, we sought to describe IRA associated pathophysiological consequences using cardiac magnetic resonance (CMR).

**Methods:** 1235 AMI patients (n=795 ST-elevation (STEMI) and 440 non-STEMI) underwent CMR following percutaneous coronary intervention. Blinded core-laboratory data were compared according to left anterior descending (LAD), left circumflex (LCx) and right coronary artery (RCA) regarding major adverse clinical events (MACE) within 12 months. Left ventricular (LV) global longitudinal/circumferential/radial (GLS/GCS/GRS) as well as left atrial (LA) total ( $\epsilon_s$ ), passive ( $\epsilon_e$ ) and active ( $\epsilon_a$ ) strains were determined using CMR-feature tracking. Tissue characterisation included infarct size (IS) and microvascular obstruction.

**Results:** LAD and LCx were associated with higher mortality compared to RCA lesions (4.6% and 4.4% vs 1.6%). LAD lesions showed largest IS (16.8%), largest ventricular (LV) ejection fraction (EF) 47.4%, GLS -13.2%, GCS -20.8% and atrial ( $\epsilon_s$  20.2%) impairment. There was less impairment in LCx (IS 11.8%, LVEF 50.8%, GLS -17.4%, GCS -25.0%,  $\epsilon_s$  20.7%) followed by RCA lesions (IS 11.3%, LVEF 50.8%, GLS -19.1%, GCS -26.6%,  $\epsilon_s$  21.7%). In AUC analyses  $\epsilon_s$  (LAD, RCA) and GLS (LCx) best predicted MACE (AUC>0.69). Multivariate analyses identified  $\epsilon_s$  (p=0.017) in LAD and GLS (p=0.034) in LCx infarcts as independent predictors of MACE.

**Conclusions:** CMR allows IRA specific phenotyping and characterisation of morphologic and functional changes. These alterations carry infarct specific prognostic implications and may represent novel diagnostic and therapeutic targets following AMI.
